# Supplementary material for: Affinity purification-mass spectrometry analysis of bcl-2 interactome identified SLIRP as a novel interacting protein
Source: PubMed Central journal article supplement (PMC4849145; doi:10.1038/cddis.2015.357), 2016-02-11

100X

nuclei

bcl-2

SLIRP

merge

MDA MB 231  
Flag bcl-2

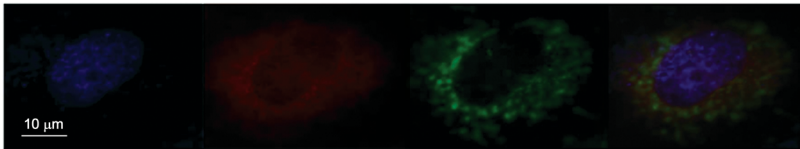

100X

nuclei

bcl-2

SLIRP

merge

H1299  
Flag bcl-2

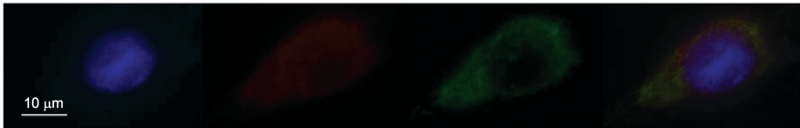

Supplement: cddis2015357x1.pdf [file cddis2015357x1.pdf]
